# Supplementary material
Source: Springer Nature journal article supplement (https://www.springermedizin.de/resource/supplementary/12906_2010_301_MOESM2_ESM.pdf/9519374)

A

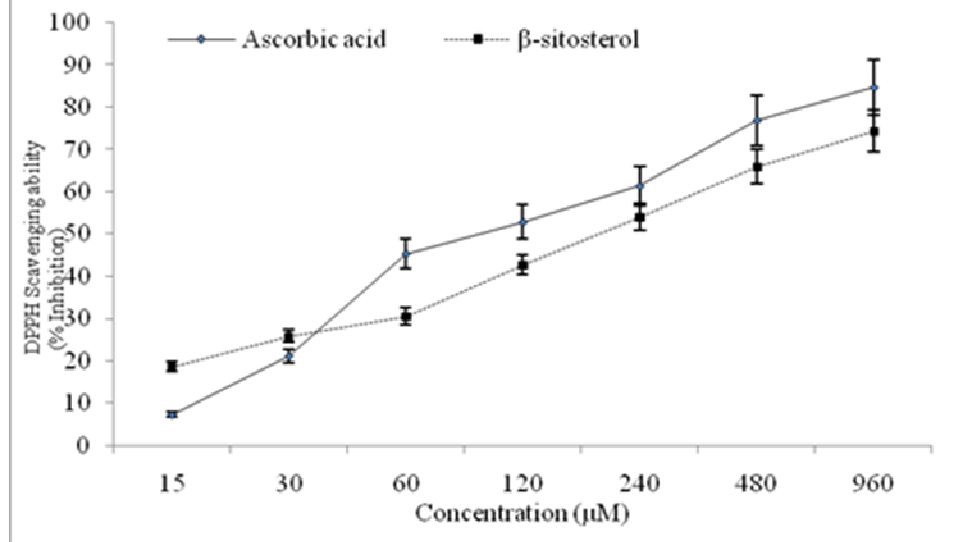

B

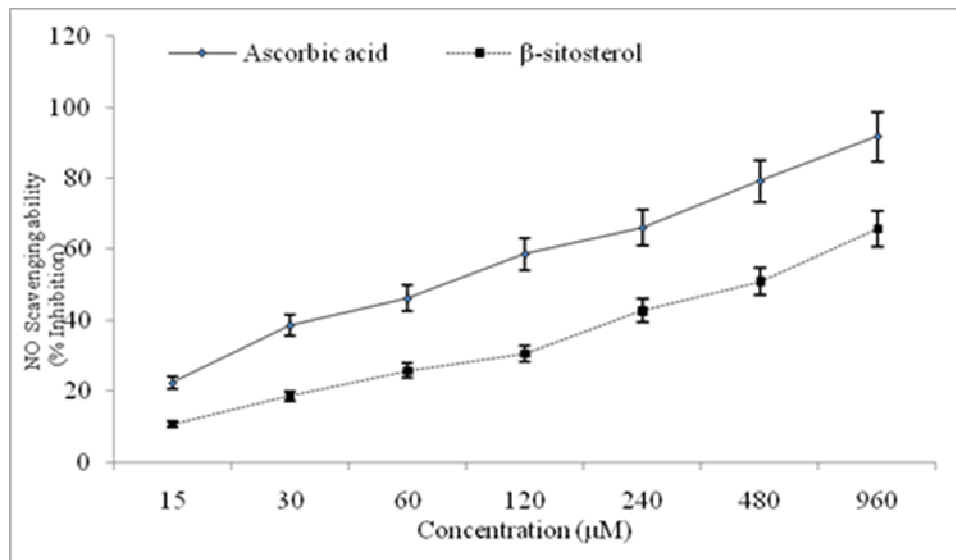

Supplement: MOESM2 [file 9519374]
